# Supplementary material
Source: PubMed Central journal article supplement (PMC7348552)
Supplement: JB.00046-20-s0001.pdf [file JB.00046-20-s0001.pdf]

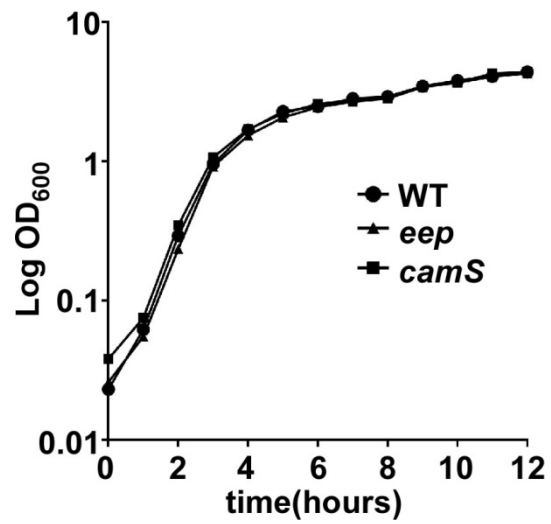

**Fig. S1.** The effect of the *eep*- and the *camS*-deletion on the growth of *S. aureus*.

OD<sub>600</sub> in TSB was measured every hour for 12 h. WT, *S. aureus* USA300; *eep*, the *eep*-deletion mutant; *camS*, the *camS*-deletion mutant.

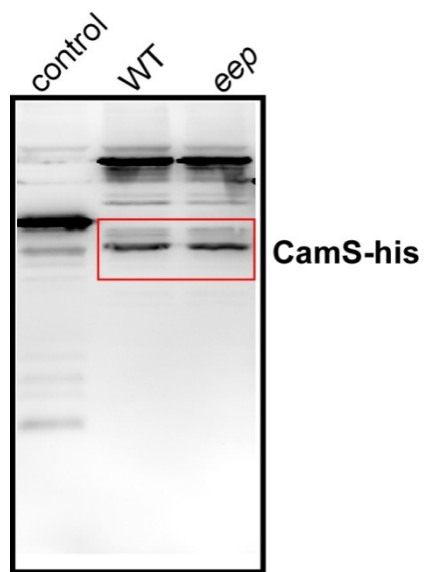

**Fig. S2. The confirmation of the overexpression of CamS by Western blot**

**analysis.** An equal number of cell pellets was used for the analysis (see Materials and Methods). CamS protein was detected with anti-His-tag antibody.

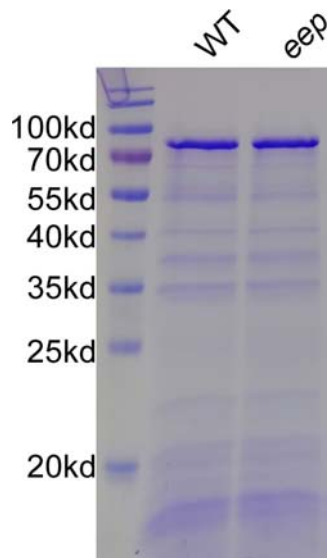

**Fig. S3. Eep does not affect the gross protein-secretion profile.** The supernatants of bacteria were collected by centrifugation, passed through 0.22  $\mu\text{m}$  filter, and precipitated by TCA. The samples were loaded on 12% SDS-PAGE gel and stained with Coomassie brilliant blue. WT, *S. aureus* USA300; *eep*, the *eep*-deletion mutant.

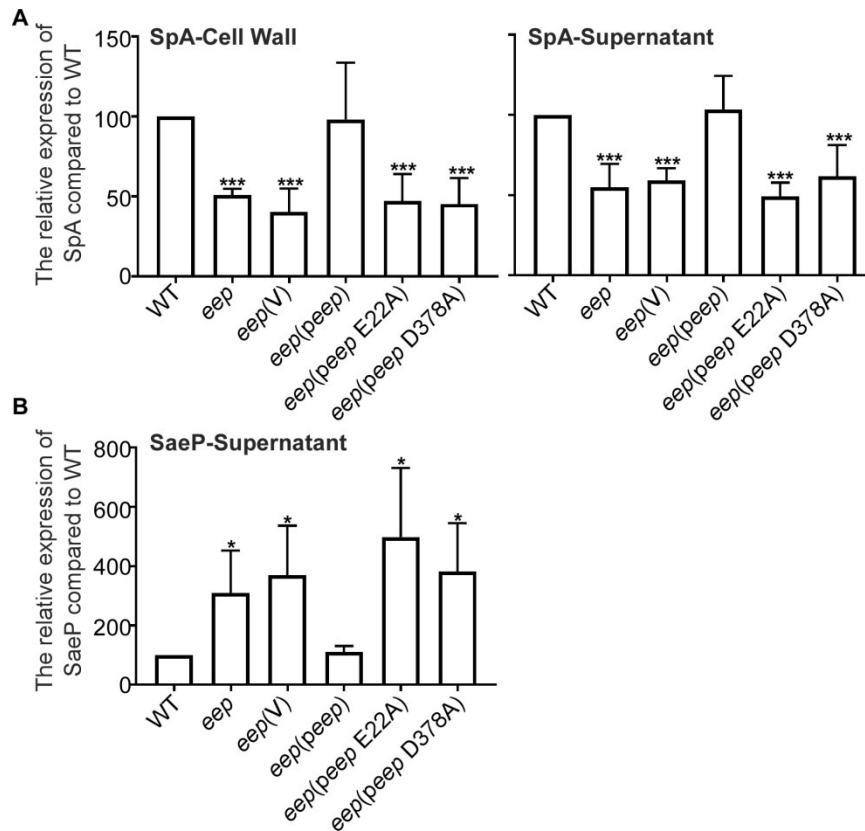

**Fig. S4. The quantification of Western blot results for SpA (A) and SaeP (B).** The protein bands were quantified by Image J. \*,  $p < 0.05$ ; \*\*\*,  $p < 0.001$  by unpaired, two-tailed Student's t-test. WT, *S. aureus* USA300; *eep*, the *eep*-deletion mutant; V, the vector pCL55; *peep*, pCL55 containing the *eep* gene; *peep* E22A, *peep* containing the E22A mutation; *peep* D378A, *peep* containing the D378A mutation.

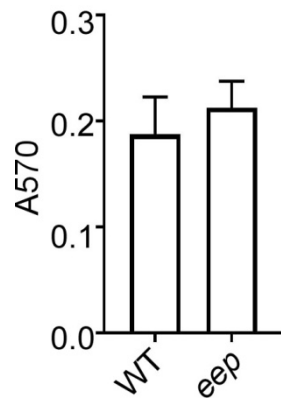

**Fig. S5. Eep is not required for biofilm formation.** The effect of the *eep*-deletion on the biofilm formation of *S. aureus*. The extent of biofilm formation was determined by crystal violet staining of the bacterial cells.

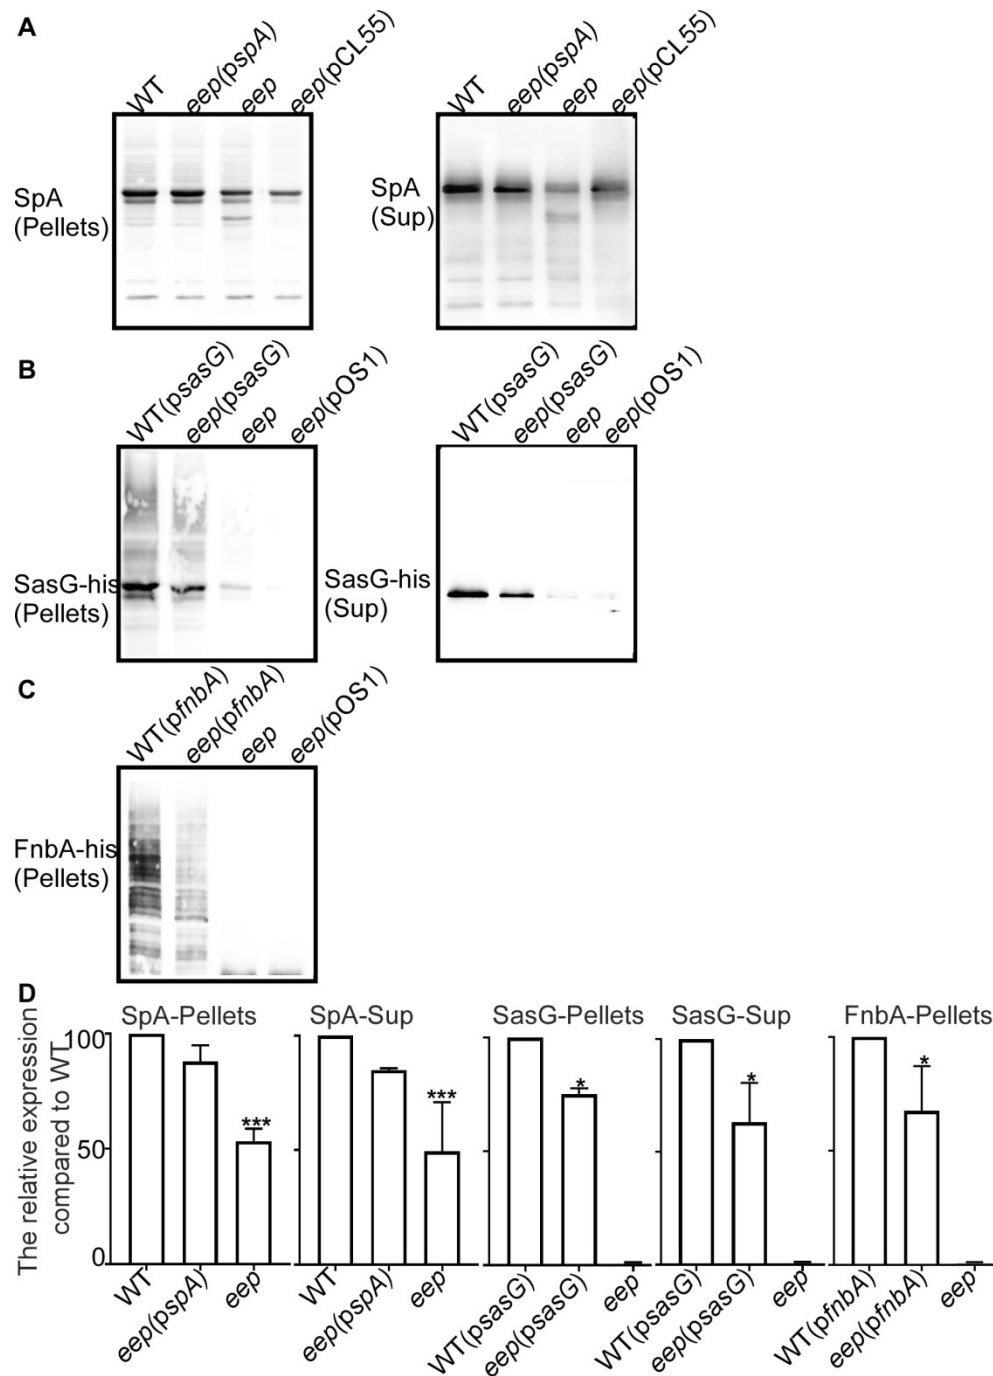

**Fig. S6. The confirmation of the additional expression of the adhesins SpA, SasG, and FnbA.** (A-C) Western blot analysis for SpA (A), SasG (B) and FnbA (C). An equal number of cells was used for the analysis (see Materials and Methods). SpA protein was detected with anti-SpA antibody, whereas SasG and FnbA proteins were detected with anti-His-tag antibody. Pellets, cell pellets; Sup, supernatant. Due to extensive degradation of FnbA, we could not compare the FnbA expression in the

culture supernatant. (D) The quantification of the Western blot results. The scanned images of the protein bands were quantified by Image J. \*,  $p < 0.05$ ; \*\*\*,  $p < 0.001$  by unpaired, two-tailed Student's t-test. WT, *S. aureus* USA300; *eep*, *eep*-deletion mutant; *pspA*, pCL55-*spA*; *psasG*, pOS1-*sasG*-His; *pfnbA*, pOS1-*fnbA*-His.

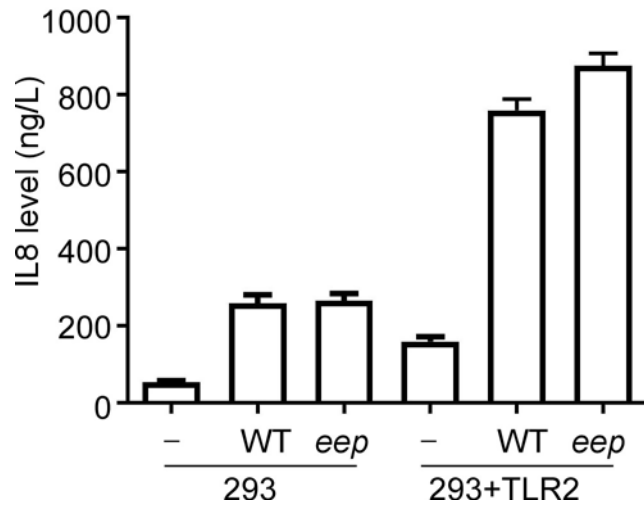

**Fig. S7. The effect of the *eep*-deletion on the TLR2-mediated activation of IL8 secretion.** The HEK293 cells were transfected with pcDNA3.0-TLR2 for 6 h. Then, the transfected cells were stimulated with either WT or the *eep*-deletion mutant for 24 h. Finally, the IL8 in the culture supernatant was measured by ELISA assay. -, no bacteria; WT, the wild-type USA300; *eep*, the *eep*-deletion mutant of USA300.



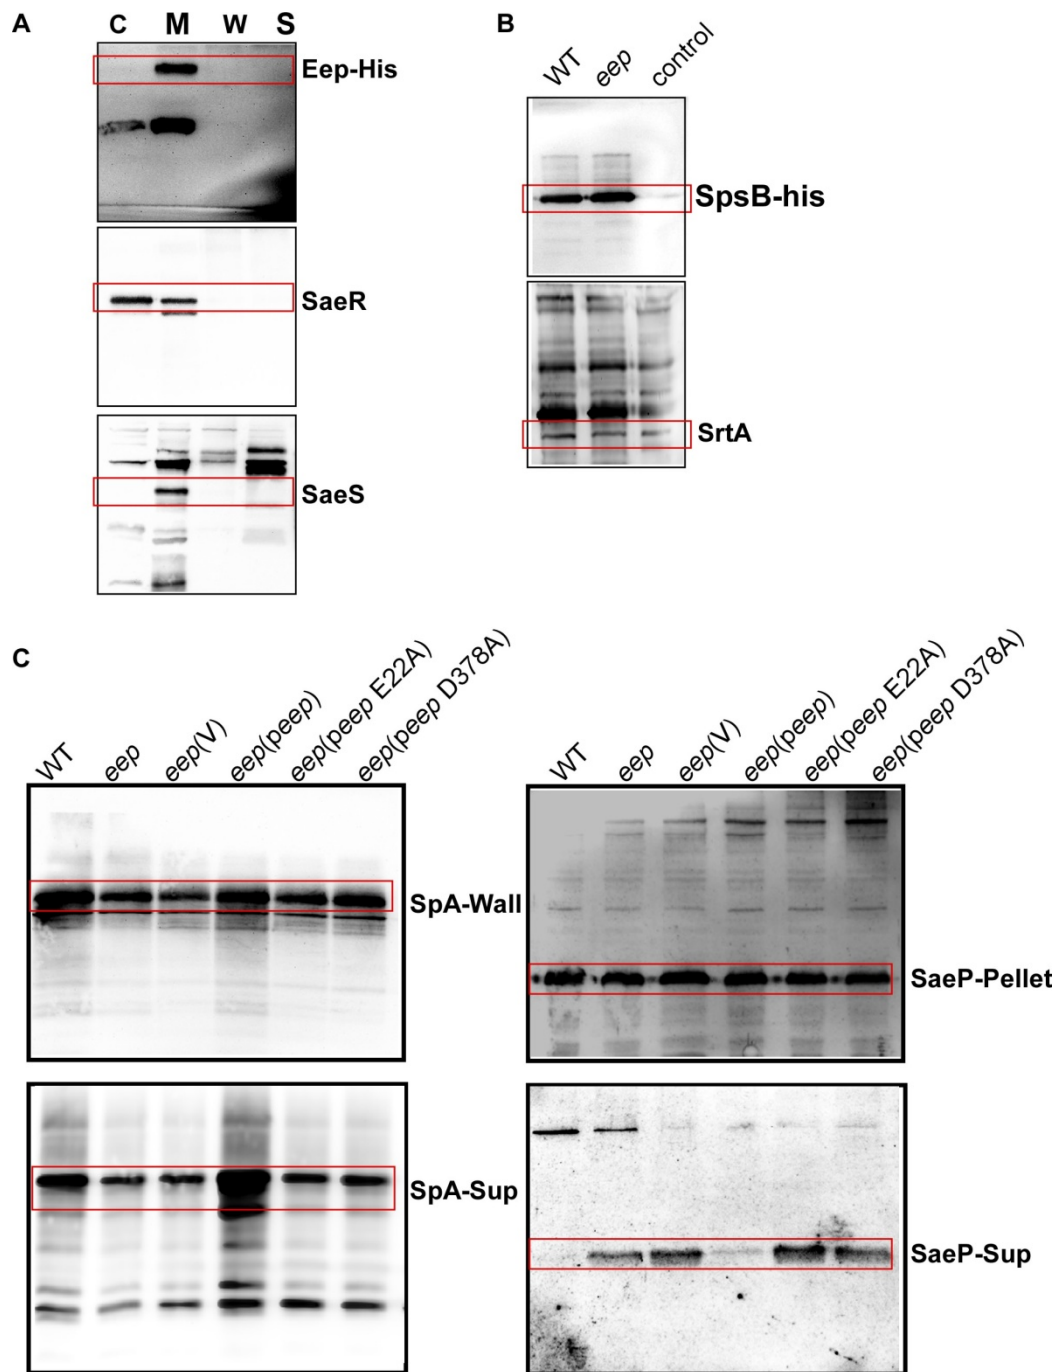

**Fig. S8. Full-length Western blots.**(A) Full-length blots for Fig 1D. (B) Full-length blots for Fig 3. (C) Full-length blots for Fig 4.

**Table S1. Bacterial strains and plasmids used in this study.**

| Strain or plasmid    | Relevant characteristic                                                    | Origin or reference |
|----------------------|----------------------------------------------------------------------------|---------------------|
| <i>E. coli</i>       |                                                                            |                     |
| DH5 $\alpha$         | Plasmid free, restriction deficient                                        | New England Biolabs |
| <i>S. aureus</i>     |                                                                            |                     |
| RN4220               | Restriction deficient, prophage cured                                      | (1)                 |
| USA300-P23           | USA300-0114 without plasmid 2 and 3                                        | (2)                 |
| USA300 $\Delta eep$  | USA300-P23 with the deletion of <i>eep</i>                                 | This study          |
| USA300 $\Delta camS$ | USA300-P23 with the deletion of <i>camS</i>                                | This study          |
| NM $\Delta phoB$     | Newman strain with the deletion of <i>phoB</i>                             | (3)                 |
| <i>Plasmid</i>       |                                                                            |                     |
| pKOR1                | Allelic replacement plasmid                                                | (4)                 |
| pIMAY                | Allelic replacement plasmid                                                | (5)                 |
| pKOR1 $\Delta camS$  | pKOR1 containing <i>camS</i> deletion cassette                             | This study          |
| pIMAY $\Delta eep$   | pIMAY containing <i>eep</i> deletion cassette                              | This study          |
| pCL55                | An integration vector for <i>S. aureus</i>                                 | (6)                 |
| <i>peep</i>          | pCL55 carrying the <i>eep</i> gene with His-tag sequence at the C-terminus | This study          |
| <i>peep</i> E22A     | <i>peep</i> with the E22A mutation                                         | This study          |
| <i>peep</i> D378A    | <i>peep</i> with the D378A mutation                                        | This study          |
| <i>peep</i> S2-phoB  | <i>peep</i> where the <i>phoB</i> gene without signal                      | This study          |

|                        |                                                                                                      |            |
|------------------------|------------------------------------------------------------------------------------------------------|------------|
|                        | peptide sequence was inserted at S2 position                                                         |            |
| <i>peep</i> E38-phoB   | <i>peep</i> where the <i>phoB</i> gene without signal peptide sequence was inserted at E38 position  | This study |
| <i>peep</i> N91-phoB   | <i>peep</i> where the <i>phoB</i> gene without signal peptide sequence was inserted at N91 position  | This study |
| <i>peep</i> T250-phoB  | <i>peep</i> where the <i>phoB</i> gene without signal peptide sequence was inserted at T250 position | This study |
| <i>peep</i> G339-phoB  | <i>peep</i> where the <i>phoB</i> gene without signal peptide sequence was inserted at G339 position | This study |
| <i>peep</i> Y387-phoB  | <i>peep</i> where the <i>phoB</i> gene without signal peptide sequence was inserted at Y387 position | This study |
| <i>peep</i> D422-phoB  | <i>peep</i> where the <i>phoB</i> gene without signal peptide sequence was inserted at Y387 position | This study |
| <i>pspA</i>            | pCL55 carrying the <i>spa</i> gene with its own promoter                                             | This study |
| pOS1                   | A multi-copy plasmid for <i>S. aureus</i>                                                            | (7)        |
| pOS1- <i>camS</i> -his | pOS1 carrying the <i>camS</i> gene with His-tag at the C-terminus                                    | This study |
| pOS1- <i>spsB</i> -His | pOS1 carrying the <i>spsB</i> gene with His-tag at the C-terminus                                    | This study |
| pOS1- <i>fnbA</i> -His | pOS1 carrying the <i>fnbA</i> gene with His-tag at the C-terminus                                    | This study |

pOS1 carrying the *sasG* gene with His-tag This study  
pOS1-*sasG*-His sequence at the C-terminus

**Table S2. Oligonucleotides used in this study.**

| Name  | Sequence (5' → 3')                                          | Target                    |
|-------|-------------------------------------------------------------|---------------------------|
| P1986 | ATTGGATTGGAAGTAC<br>GCTTTGGCAGTTTATTCTTGACATGTA             | LIC for pIMAY             |
| P1987 | ATTGGAAGTGGATAAC<br>CGAAGTGATCTTCCGTCACAGGTATT              | LIC for pIMAY             |
| P2481 | TACTTCCAATCCAATG<br>GGCGGCCTTGTGTTAATGATA                   | For <i>eep</i> deletion   |
| P2482 | AATGCCTGCTCTTTTCGCAAAAAC<br>GTTTTTTGCGAAAAGAGCAGGCATT       | For <i>eep</i> deletion   |
| P2483 | TTTAGGAGGATAAATAATTATG<br>TTATCCACTTCCAATG                  | For <i>eep</i> deletion   |
| P2484 | CTAATTCAATATTATCTGTGCC                                      | For <i>eep</i> deletion   |
| P236  | ATTGGAAGTGGATAACGGTACCGGTTCCGAGGCTC                         | LIC for pKOR1             |
| P237  | ATTGGATTGGAAGTACGGGCCCCGAGCTTAAGACTGG                       | LIC for pKOR1             |
| P474  | TACTTCCAATCCAATG<br>CGTTTCATGATGTAGCAGCTATG                 | For <i>cams</i> deletion  |
| P475  | TTGTAAATTAAGATAATAAAAAGG                                    | For <i>cams</i> deletion  |
| P476  | CCTTTTTATTATCTTTAATTTACAA<br>GACATACCCCTCTAACTATTTA         | For <i>cams</i> deletion  |
| P477  | TTATCCACTTCCAATG<br>CAGGTGTAGTCACACCTACTGC                  | For <i>cams</i> deletion  |
| P35   | ATTGGAAGTGGATAAC<br>CGGAGGAGGGATGTAAAATGTGG                 | pCL55                     |
| P80   | ATTGGATTGGAAGTAC<br>GAATTCTTGAAGACGAAAGGGCCTCG              | pCL55                     |
| P249  | TTATCCACTTCCAATG<br>GCTAATATATTAGCATTGATTGC                 | For <i>eep</i> complement |
| P78   | TACTTCCAATCCAATGctaatgatgatgatgatgTAAGAAATAT<br>CGTCGAATATC | For <i>eep</i> complement |
| PL85  | GTAACGTTCAT <i>gca</i> TATGGCCATATG                         | For <i>eep</i> E22A       |
| PL86  | CATATGGCCATA TGC ATGAACAGTTAC                               | For <i>eep</i> E22A       |
| PL87  | CCTATTCCTGCACTA <i>gca</i> GGTGGTTCGTATT                    | For <i>eep</i> D378A      |
| PL88  | AATACGACCACC TGC TAGTGCAGGAATAGG                            | For <i>eep</i> D378A      |
| PL22  | TATTTAGTTACAATAATTGCA                                       | For <i>peep</i> S2-phoB   |
| PL23  | GCTCACTCGCTACACCTCGATTG                                     | For <i>peep</i> S2-phoB   |
| PL24  | CAATCGAGGTGTAGCGAGTGAGC<br>ATGCAATCCGATAAAAGTTCTAAAG        | For <i>peep</i> S2-phoB   |
| PL25  | TGCAATTATTGTAACATAAATA                                      | For <i>peep</i> S2-phoB   |

|       |                                                    |                           |
|-------|----------------------------------------------------|---------------------------|
|       | CTTGAATATATCAAATATTATTTTTGC                        |                           |
| PL80  | TTTGCGATCGGTATGGGGCCA                              | For <i>peep</i> E38-phoB  |
| PL81  | TTCTGGACACATAATGCCTGCTC                            | For <i>peep</i> E38-phoB  |
|       | GAGCAGGCATTATGTGTCCAGAA                            |                           |
| PL82  | ATGCAATCCGATAAAAAGTTCTAAAG                         | For <i>peep</i> E38-phoB  |
|       | TGGCCCCATACCGATCGCAA                               |                           |
| PL83  | CTTGAATATATCAAATATTATTTTTGC                        | For <i>peep</i> E38-phoB  |
| PL26  | GAAGAAAATGAAATAACACATATC                           | For <i>peep</i> N91-phoB  |
| PL27  | ATTAAGTTTAATTTTAACGTTTCATAC                        | For <i>peep</i> N91-phoB  |
|       | GTATGAACGTTAAAATTAACCTTAAT                         |                           |
| PL28  | ATGCAATCCGATAAAAAGTTCTAAAG                         | For <i>peep</i> N91-phoB  |
|       | GATATGTGTTATTTTCATTTTCTTC                          |                           |
| PL29  | CTTGAATATATCAAATATTATTTTTGC                        | For <i>peep</i> N91-phoB  |
| PL30  | ACTGTAAATTTGAACGTGATGG                             | For <i>peep</i> T250-phoB |
| PL31  | CGTCTTATTATCTTTAACTTTATC                           | For <i>peep</i> T250-phoB |
|       | GATAAAGTTAAAGATAATAAGACG                           |                           |
| PL32  | ATGCAATCCGATAAAAAGTTCTAAAG                         | For <i>peep</i> T250-phoB |
|       | CCATCACGTTCAAATTTAACAGT                            |                           |
| PL33  | CTTGAATATATCAAATATTATTTTTGC                        | For <i>peep</i> T250-phoB |
| PL34  | ATTTATCATAACGTGCGACTCAG                            | For <i>peep</i> G339-phoB |
| PL35  | ACCAACCGGACCATTTAACATATC                           | For <i>peep</i> G339-phoB |
|       | GATATGTTAAATGGTCCGGTTGGT                           |                           |
| PL36  | ATGCAATCCGATAAAAAGTTCTAAAG                         | For <i>peep</i> G339-phoB |
|       | CTGAGTCGACGTTATGATAAAT                             |                           |
| PL37  | CTTGAATATATCAAATATTATTTTTGC                        | For <i>peep</i> G339-phoB |
| PL38  | GAAGCGATTTTCAGAAAACCAG                             | For <i>peep</i> Y387-phoB |
| PL39  | ATATATAACAAATAAAATACGAC                            | For <i>peep</i> Y387-phoB |
|       | GTCGTATTTTATTTGTTATATAT                            |                           |
| PL40  | ATGCAATCCGATAAAAAGTTCTAAAG                         | For <i>peep</i> Y387-phoB |
|       | CTGGTTTTCTGAAAATCGCTTC                             |                           |
| PL41  | CTTGAATATATCAAATATTATTTTTGC                        | For <i>peep</i> Y387-phoB |
| PL42  | ATTCGACGATATTTCTTACATC                             | For <i>peep</i> D422-phoB |
| PL43  | ATCATTCCACGTTACTAATATC                             | For <i>peep</i> D422-phoB |
|       | GATATTAGTAACGTGGAATGAT                             |                           |
| PL44  | ATGCAATCCGATAAAAAGTTCTAAAG                         | For <i>peep</i> D422-phoB |
|       | GATGTAAGAAATATCGTCGAAT                             |                           |
| PL45  | CTTGAATATATCAAATATTATTTTTGC                        | For <i>peep</i> D422-phoB |
| PL428 | GAGCCCGGG CCAAACCTGGTCAATCAATGGCG                  | For SpsB-his expression   |
| PL429 | GCCGTCGACcta atg atg atg atg atg ATTTTAGTATTTTCAGG | For SpsB-his expression   |
|       | ATTGAAATTATG                                       |                           |
| PL351 | GAGCCCGGG ATGAAGCGTACATTAGTATTATTG                 | For CamS-his expression   |
| PL352 | GAGGGATCC cta atg atg atg atg ATTACTGTAA           | For CamS-his expression   |
|       | ATATGAACTTGCGGTTC                                  |                           |
| P221  | GAGCCCGGGCGCAAGTGTGCTGT                            | For <i>pspA</i>           |

|       |                                                                |                               |
|-------|----------------------------------------------------------------|-------------------------------|
| P222  | GAGGGATCCTTATAGTTCGCGACGACGTC                                  | For <i>pspA</i>               |
| PL501 | GAG <b>CCCGGG</b> CTGATGACTTGAATACAATTTATAGG                   | For FnbA-his expression       |
| PL502 | GAGGGATCC ctaatgatgatgatgatg TGCTTTGTGATTCTT<br>TTTATTTCTGCG   | For FnbA-his expression       |
| PL503 | GAG <b>CCCGGG</b> GAAATTCAATGCTATTGAGTTGATGGG                  | For SasG-his expression       |
| PL504 | GAGGGATCC ctaatgatgatgatgatg AATCCGGATTAAATT<br>TACGTTCTTTCTTG | For SasG-his expression       |
| PL464 | <i>cgc</i> GGTACC G ATGCCACATACTTTGTGGATGG                     | For TLR2 overexpression       |
| PL465 | CGC TCTAGA CTAGGACTTTATCGCAGCTCTCAG                            | For TLR2 overexpression       |
| P41   | CAGCAAACCATGCAGATGCTA                                          | Real-time PCR for <i>spA</i>  |
| P42   | ACCGATGAATGGATTTTCTTCAC                                        | Real-time PCR for <i>spA</i>  |
| PL152 | CAACCATTGCGATTTCTTTACC                                         | Real-time PCR for <i>saeP</i> |
| PL153 | TTAGCTTTAGGTGCTTGTGG                                           | Real-time PCR for <i>saeP</i> |
| P43   | CAAATGATCACAGCATTTGGTACAG                                      | Real-time PCR for <i>gyrB</i> |
| P44   | CGGCATCAGTCATAATGACGAT                                         | Real-time PCR for <i>gyrB</i> |

## REFERENCES

1. Kreiswirth BN, Lofdahl S, Betley MJ, O'Reilly M, Schlievert PM, Bergdoll MS, Novick RP. 1983. The toxic shock syndrome exotoxin structural gene is not detectably transmitted by a prophage. *Nature* 305:709-712.
2. Jeong DW, Cho H, Lee H, Li C, Garza J, Fried M, Bae T. 2011. Identification of the P3 promoter and distinct roles of the two promoters of the SaeRS two-component system in *Staphylococcus aureus*. *J Bacteriol* 193:4672-4684.
3. Liu Q, Cho H, Yeo WS, Bae T. 2015. The extracytoplasmic linker peptide of the sensor protein SaeS tunes the kinase activity required for staphylococcal virulence in response to host signals. *PLoS Pathog* 11:e1004799.
4. Bae T, Schneewind O. 2006. Allelic replacement in *Staphylococcus aureus* with inducible counter-selection. *Plasmid* 55:58-63.
5. Monk IR, Tree JJ, Howden BP, Stinear TP, Foster TJ. 2015. Complete Bypass of Restriction Systems for Major *Staphylococcus aureus* Lineages. *MBio*

6:e00308-15.

6. Lee CY, Buranen SL, Ye ZH. 1991. Construction of single-copy integration vectors for *Staphylococcus aureus*. *Gene* 103:101-105.
7. Wang Y, Hu M, Liu Q, Qin J, Dai Y, He L, Li T, Zheng B, Zhou F, Yu K, Fang J, Liu X, Otto M, Li M. 2016. Role of the ESAT-6 secretion system in virulence of the emerging community-associated *Staphylococcus aureus* lineage ST398. *Sci Rep* 6:25163.
